# Supplementary material for: RETRACTED ARTICLE: Einsatz von künstlicher Intelligenz im Management akuter Leukämien
Source: Springer Nature journal article supplement (doi:10.1007/s00761-022-01153-4), 2022-04-20
Supplement: MOESM1 [file 20326888]

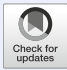

# Einsatz von künstlicher Intelligenz im Management akuter Leukämien

Anne Sophie Kubasch<sup>1</sup> · Nora Grieb<sup>1,2</sup> · Alexander Oeser<sup>1,2</sup> · Claudia Haferlach<sup>1,3</sup> · Uwe Platzbecker<sup>1</sup>

<sup>1</sup>Klinik und Poliklinik für Hämatologie, Zelltherapie und Hämostaseologie, Arbeitsgruppe: „Artificial Intelligence in Hematology“, Universitätsklinikum Leipzig, Leipzig, Deutschland

<sup>2</sup>Innovation Center Computer Assisted Surgery, ICCAS, Leipzig, Deutschland

<sup>3</sup>MLL Münchner Leukämielabor, München, Deutschland

## In diesem Beitrag

- Die Künstliche Intelligenz als Katalysator für den Einsatz von Schlüsseltechnologien in der Medizin  
Maschinelles Lernen • „Deep learning“
- Anwendungen von KI  
Diagnostik • Prognoseeinschätzung und Therapieempfehlung
- Ausblick

## Zusammenfassung

**Hintergrund:** Auf künstlicher Intelligenz (KI) basierende Systeme könnten künftig das Gesundheitswesen weltweit revolutionieren und erhöhen bereits jetzt die Genauigkeit und Effizienz von Diagnose und Behandlung in verschiedenen Fachbereichen, einschließlich der Hämatologie. Die Systeme sind in der Lage, große Datenmengen zu interpretieren, um die Früherkennung und Prognosebeurteilung sowie den Therapieentscheidungsprozess von hämatologischen Erkrankungen zu unterstützen. Der jüngste Erfolg KI-basierter Systeme ist dabei sowohl auf die rasante Leistungsbesserung in der Computertechnik als auch auf die Etablierung neuer Lernalgorithmen zurückzuführen. Zusätzlich steigt im medizinischen Bereich die Verfügbarkeit großer Datensätze durch die voranschreitende Digitalisierung und Formalisierung der allgemeinen klinischen Dokumentation, Innovationen in bildgebenden Verfahren sowie durch den zunehmenden Routineeinsatz von Hochdurchsatz-Sequenzierungstests. Diese ermöglichen die Einbeziehung molekularer Daten in die klinische Entscheidungsfindung und folglich personalisierte Interventionen, die das Paradigma „gleiche Therapie für alle“ auf Therapieentscheidungen überwinden und infolgedessen den individuellen Behandlungserfolg verbessern.

**Schlussfolgerung:** Potenzielle Anwendungen von KI-basierten Methoden in der Hämatologie sind vielfältig: Neben der Generierung neuer Evidenz eröffnen Methoden des „maschinellen Lernens“ (ML) vielversprechende Möglichkeiten, Hämatologen in zeitraubenden Routineaufgaben zu unterstützen, sodass ärztliche Ressourcen für kognitiv anspruchsvollere Aufgaben, z. B. Klärung sehr seltener klinischer Konstellationen sowie der Kommunikation mit Patienten genutzt werden können.

### Schlüsselwörter

Künstliche Intelligenz · Präzisionsmedizin · „Deep learning“ · Maschinelles Lernen · Hämatologische Erkrankungen

Große Fortschritte im Verständnis über die molekularen und pathophysiologischen Mechanismen von hämatologischen Erkrankungen, insbesondere von akuten myeloischen und lymphatischen Leukämien, führten in den letzten Jahren zu sich rasch entwickelnden, neuartigen Diagnoseverfahren und individuell zielgerichteten Therapieoptionen.

## Die Künstliche Intelligenz als Katalysator für den Einsatz von Schlüsseltechnologien in der Medizin

In den letzten 10 Jahren hat das Interesse an dem Einsatz der künstlichen Intelligenz (KI) in der Medizin rasant zugenommen und wurde insbesondere durch die Einführung von Deep-Learning-Algorithmen,

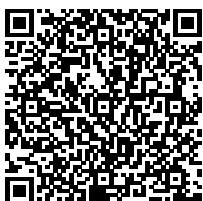

QR-Code scannen & Beitrag online lesen

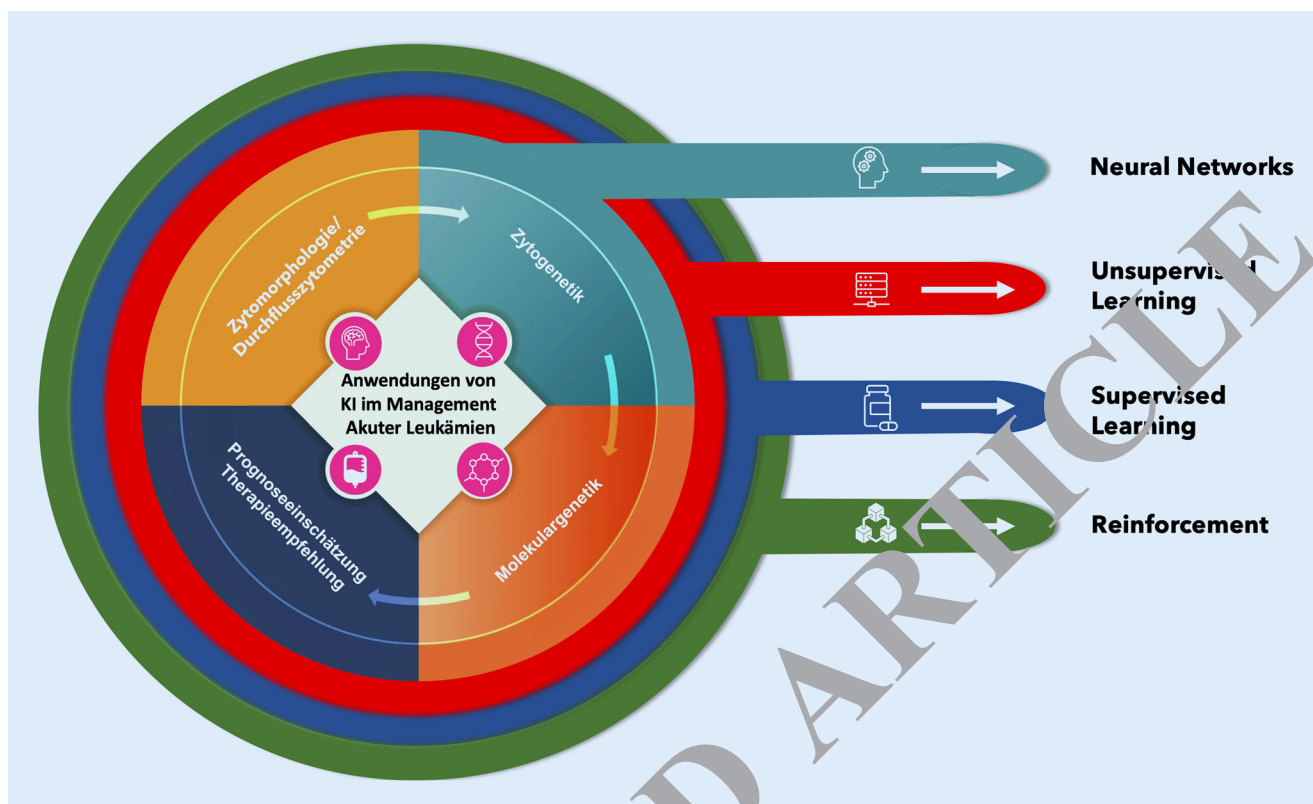

**Abb. 1** ▲ Übersicht der potenziellen Anwendungsbereiche von künstlicher Intelligenz (KI) im Management akuter Leukämien sowie deren assoziierte Methoden

kontinuierlichen Fortschritten in der IT-Rechentechnik und das exponentielle Wachstum von medizinischen Daten einsetzbar. Die Medizin des derzeitigen Jahrhunderts befindet sich damit in einer entscheidenden Wandlungsphase. Die fortschreitende Digitalisierung ermöglicht die Erfassung und Auswertung einer immer größer werdenden Datenmenge, wodurch sich der Bereich der Medizin zum Katalysator für den Einsatz von Schlüsseltechnologien wie KI wird [1].

### » Die Medizin des derzeitigen Jahrhunderts befindet sich in einer entscheidenden Wandlungsphase

Während Konzepte der KI den menschlichen Denkprozess nachbilden sollen, geht es in der Unterkategorie des maschinellen Lernens (ML) um die Anwendung mathematischer Methoden zur Identifikation von Mustern in Daten [2]. Der Bereich der Onkologie und Hämatologie ist aufgrund der starken Heterogenität der Erkrankungen für den künftigen Einsatz von KI nahezu prädisponiert (■ Abb. 1). Um den

hohen Ansprüchen dieser „personalisierten“ Medizin gerecht zu werden und die für jeden Patienten zielgerichtete, zugleich wirksamste und verträglichste Therapieoption zu identifizieren, wird der Einsatz von KI-gestützten Diagnose- und Therapieentscheidungshilfen in der modernen Hämatologie künftig unerlässlich sein ([3]; ■ Abb. 1). Zudem werden durch die nun verfügbare KI-basierte Analyse von großen Datenmengen, prädiktive und prognostische Algorithmen zur individuellen Therapiesteuerung inkl. der Vorhersage von zu erwartenden Nebenwirkungen sowie des persönlichen Risikos eines Krankheitsprogresses oder Rezidivs enorm an Bedeutung in der täglichen Krankenversorgung gewinnen [4].

### Maschinelles Lernen

Im Spektrum der Möglichkeiten zur Anwendung von KI-assozierten Entwicklungsprozessen für klinische Anwendungen können die methodischen Lösungen engmaschig auf die praktischen Problemstellungen angepasst werden. Welcher

methodische Ansatz dabei eingesetzt wird, hängt v. a. von der Menge, Komplexität und Qualität der verfügbaren Daten sowie der jeweiligen Aufgabe (z. B. Klassifikation, Regression oder Mustererkennung) ab. Eignet sich ein Datensatz aufgrund seiner Ausprägungen für die Anwendung von Verfahren des ML, so kann dieser als Trainingsmenge für die Erzeugung eines ML-Modells verwendet werden [5]. Durch den angewendeten ML-Algorithmus, welcher je nach Methodik auf unterschiedlichen mathematischen Konzepten basiert, wird auf diese Weise ein Formalismus der im Datensatz enthaltenen Evidenz generiert. Aufgrund der enormen technologischen Fortschritte in der Halbleiterindustrie sowie der damit verbundenen Implikationen für die Hersteller moderner IT-Systeme können nun komplexe Berechnungen in einem Bruchteil der Zeit erledigt werden, die noch vor etwa einigen Jahren für dieselbe Aufgabe benötigt wurde.

In der Medizin werden die Begriffe KI, ML und „deep learning“ (DL; ■ Abb. 1) oft fälschlicherweise synonym verwendet

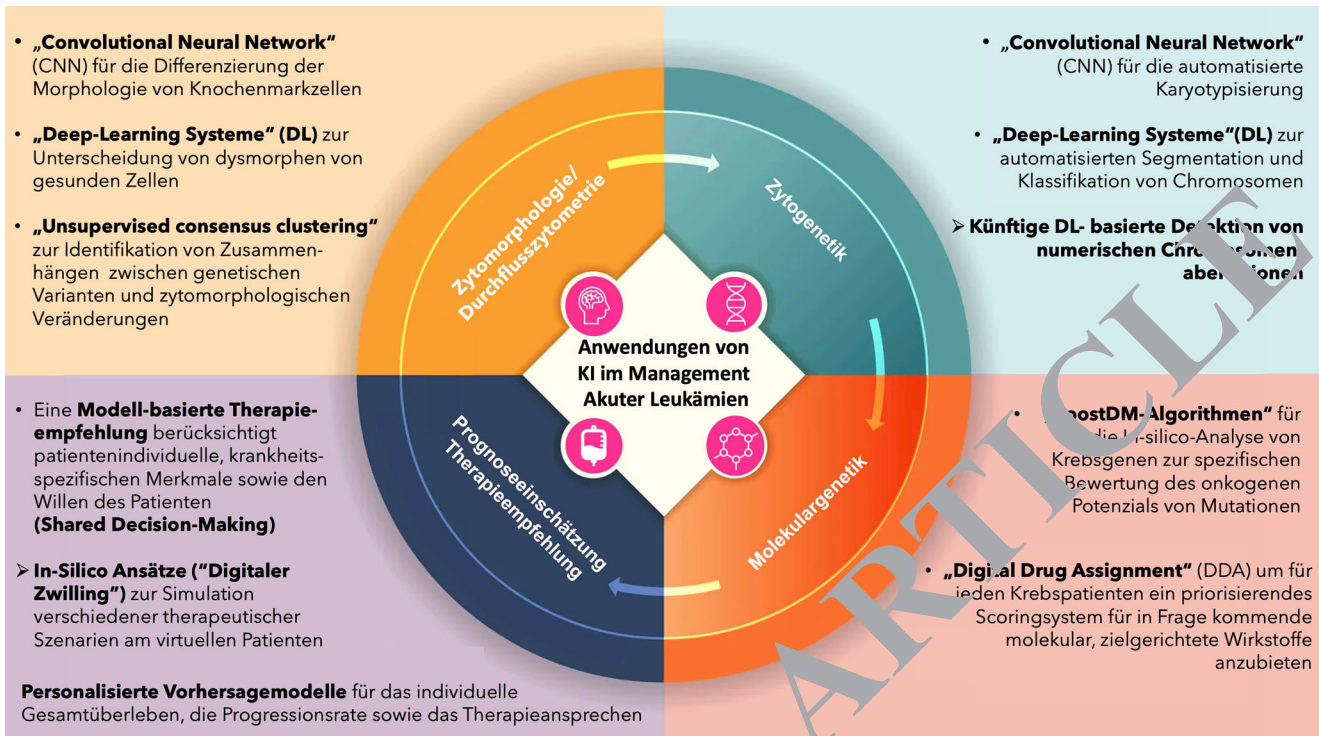

**Abb. 2** ▲ Anwendungsbeispiele von auf künstlicher Intelligenz (KI) basierenden Methoden für das Management von Patienten mit akuten Leukämien

[3, 5, 6]. Während es sich bei der KI um den Prozess zur Entwicklung von Systemen handelt, die menschliche Intelligenz möglichst effektiv nachbilden oder sogar übertreffen können, repräsentiert ML eine Ansammlung algorithmischer Verfahren, welche sich auf die automatisierte Erkennung von Mustern und Zusammenhängen in großen Datenmengen beziehen. Die meisten der in der modernen Medizin zum Einsatz kommenden ML-Methoden basieren dabei auf dem Verfahren des „supervised learning“ (SL überwachtes Lernen) [7]. SL ist eine Klasse von Methoden im Bereich ML, bei der bereits annotierte Datensätze zum Erstellen entsprechender Modelle verwendet werden. Die jeweilige Zielvariable ist in der Regel bereits bekannt und wird zum Verfahren als „ground truth“ zur Verfügung gestellt. Der Algorithmus lernt im Anschluss die darin enthaltenen Zusammenhänge und Abhängigkeiten, um diese Zielvariablen herzuleiten und somit Vorhersagen für neu eingebrachte Daten treffen zu können. Nach dem Trainingsprozess kann die Qualität dieser Vorhersagen durch das Modell anhand von sog. Testdatensätzen quantitativ evaluiert werden, um die Güte des Modells zu bestimmen.

### „Deep Learning“

DL hingegen beschreibt wiederum eine weitere Klasse von Algorithmen, welche auf der Basis von „künstlichen neuronalen Netzen“ (KNN) basieren und die biologische Vernetzung von Neuronen im Nervensystem von Lebewesen algorithmisch nachbilden. Hierbei werden die Zusammenhänge in den eingebrachten Daten (Trainingsdaten) durch Verknüpfungen der Neuronen auf mehreren Schichten adaptiert. Der Begriff „deep“ beschreibt dabei besonders tiefe Netzwerkstrukturen [5, 7]. In der Medizin gehört v. a. die medizinische Bildgebung zu den Bereichen, die derzeit am meisten von DL-Techniken profitiert. Zur Entwicklung entsprechender Modelle werden dabei die radiologischen Bilder zunächst von Menschen segmentiert, klassifiziert und danach zum Trainieren des DL-Netzwerks verwendet. Mittlerweile existieren bereits praxistaugliche DL-basierte Lösungen, z. B. zur Erkennung von Hautkrebs [8] sowie von bösartigen Brustläsionen in Mammographien [9].

Der durchgreifende Erfolg von DL in der Medizin ist darüber hinaus auf die Fähigkeit der Methode zurückzuführen, informative

Merkmale aus einer enormen Datenmenge zu extrahieren, ohne das menschliche Eingreifen in diesem Prozess erforderlich wird. Diese erzielte Genauigkeit hat jedoch auch einen hohen Preis, denn DL-Algorithmen benötigen zum erfolgreichen Trainieren eines Netzwerks eine sehr große digitalisierte Datenmenge, welche in der Medizin aufgrund oftmals inhomogener kleiner Datensätze, die infolge fehlender umfassender Digitalisierung unvollständig sind, ihre Limitation erfährt [6, 7].

### » DL-Algorithmen benötigen zum Trainieren eines Netzwerks eine sehr große digitalisierte Datenmenge

Die bemerkenswerten technologischen Fortschritte im Bereich moderner Hochdurchsatzmethoden wie z. B. „next-generation sequencing“ (NGS), führen derzeit zu einer rasanten Erzeugung von hochwertigen Datengrundlagen, sodass insbesondere im Bereich der Hämatologie und Onkologie zunehmend eine große Anzahl von digitalen Daten generiert wird und darauf aufbauende Algorithmen für deren Auswertung zunehmend an Bedeutung gewinnen (▣ Abb. 2).

## Anwendungen von KI

### Diagnostik

#### Zytomorphologie

Von der Diagnostik bis hin zur Therapieentscheidung werden KI-basierte Methoden im Management von akuten Leukämie eingesetzt. Jahrzehntlang stützte sich die Diagnose von hämatologischen Erkrankungen fast ausschließlich auf der phänotypischen Bewertung von gefärbtem peripherem Blut- und Knochenmarkausstrichen unter dem Lichtmikroskop. Zytomorphologische Untersuchungen kommen bis heute weltweit bei der Diagnose einer akuten Leukämie zum Einsatz und sind im Vergleich zu neuen diagnostischen Methoden immer noch sehr günstig durchzuführen. Dennoch stellt die Komplexität der Diagnose einer akuten Leukämie und die assoziierte ausgeprägte Subjektivität der zytomorphologischen Bewertung in einigen Fällen selbst für den sehr erfahrenen Zytomorphologen eine Herausforderung hinsichtlich der Reproduzierbarkeit der Ergebnisse dar. Hinzu kommt der hohe personelle und zeitliche Aufwand bei der Durchführung einer rein manuellen zytomorphologischen Diagnostik bei Verdacht auf eine akute Leukämie.

Durch die Digitalisierung von mikroskopischen Bildern sowie den Einsatz von modernen DL-Modellen wird die automatisierte Bildverarbeitung und Zelldifferenzierung künftig immer mehr in den Fokus der klinischen Anwendungen rücken und sich der personelle und zeitliche Aufwand der Morphologen sukzessive verringern. Kürzlich trainierte Marek et al. [10] ein „convolutional neural network“ (CNN) für die Differenzierung der Morphologie von Knochenmarkzellen auf Grundlage eines großen Bilddatensatzes von 171.374 zytomorphologischen Mikroskopiebildern. Ein CNN, zu Deutsch etwa „faltendes neuronales Netzwerk“, ist ein künstliches neuronales Netz, das in der Bilderkennung und -verarbeitung verwendet wird und speziell für die Verarbeitung von Pixeldaten ausgelegt ist (Abb. 2). Das Modell identifizierte ein breites Spektrum diagnostisch relevanter Zellarten mit hoher Präzision und Reproduzierbarkeit und lieferte ein „proof of concept“ für die ML-basierte Klassifikation einzelner Knochenmarkzellen [10]. Die

Ergebnisse der Studie markieren damit einen ersten Schritt in Richtung einer standardisierten, automatisierten zytomorphologischen Klassifikation von Zellen im Knochenmark unter Verwendung modernster Bildklassifikationsalgorithmen. Kimura et al. entwickelten ein DL-System, das gleichzeitig 17 Blutzelltypen und 97 morphologische Merkmale mit einer Sensitivität von >93,5% und einer Spezifität von >96,0% klassifizierte [11]. Das Modell konnte außerdem dysmorphe von gesunden Zellen unterscheiden, was eine der Grundvoraussetzungen für die Identifizierung von bösartig veränderten Zellen sowie für die Subklassifizierung von verschiedenen hämatologischen Neoplasien darstellt. Nagata et al. entwickelten eine ML-basierte Technik, um diagnostisch und prognostisch relevante Zusammenhänge zwischen genetischen Varianten und zytomorphologischen Veränderungen beim myelodysplastischen Syndrom (MDS) zu identifizieren [12]. Durch den Einsatz von „unsupervised consensus clustering“ konnten verschiedene morphologische MDS-Profile mit sich deutlich voneinander abgrenzenden klinischen Merkmalen und unterschiedlichen Prognosen identifiziert werden.

Diese Ergebnisse der bisher verfügbaren Studienergebnisse zeigen, dass KI-gestützte Erkennung von Zelltypen und ggf. damit assoziierte Mustererkennung zur Detektion von neuen Erkrankungssubtypen zur Stratifikation und Prognoseeinschätzung auf dem richtigen Weg ist, um zeitnah auch im klinischen Umfeld Anwendung zu finden. Um die Translation von Forschungsergebnissen in den klinischen Alltag erfolgreich und sicher zu gestalten, müssen hohe regulatorische Anforderungen an die Zulassung KI-basierter Medizinprodukte überwunden werden. Aufgrund der vielversprechenden Studienergebnisse sind jedoch sicherlich in den kommenden Jahren zahlreiche, neue KI-basierte Medizinprodukte für den Bereich der zytomorphologischen Bilderkennung zu erwarten. Diese könnten künftig ein erhebliches Potenzial in der Einsparung von insbesondere Personalressourcen bilden und eine standardisierte Beurteilung zytomorphologischer Präparate auf hohem Qualitätsniveau ermöglichen, die nicht von der

individuellen Erfahrung des jeweiligen Zytomorphologen abhängig ist.

#### Durchflusszytometrie

Die Durchflusszytometrie stellt weiterhin einen integralen Bestandteil der Routinediagnostik und -nachsorge bei Patienten mit akuten Leukämien dar. Eine manuelle visuelle Datenanalyse und -interpretation liegt bisher allein in der Verantwortung des auswertenden Hämatologen und basiert somit vollständig auf dessen Expertenwissen. Zur Verringerung der Subjektivität und der assoziierten Ergebnisvariabilität und zur potenziellen Erhöhung der Konsistenz der Datenauswertung ist die Implementierung von ML-basierter, automatisierter Prozesse auch hier ein höchst erstrebenswertes Ziel. Angeletti et al. zeigte anhand einer Pilotstudie, wie ein Algorithmus anhand von Durchflusszytometriedaten zwischen Gesunden und an akuter myeloischer Leukämie (AML) erkrankten Patienten unterscheiden konnte [13]. Zunächst wurden hierfür Durchflusszytometrie-Standarddateien von 316 Gesunden und 43 AML-Patienten in multidimensionale Bildmetadateien umgewandelt. Jedem Pixel der Bilder wurde ein gewichteter Wert zugewiesen und anschließend in ein binäres Array umgewandelt [13]. Das System war in der Lage, eine Kohorte (gesund vs. AML) von Patienten zuverlässig zu klassifizieren. Biehl et al. setzten die Methode „generalized matrix relevance learning vector quantization“ (GMLVQ) bei peripheren Blut- und Knochenmarkproben zur Unterscheidung zwischen AML-Patienten und gesunden Kontrollen erfolgreich ein [14]. Die 20 Patienten mit dem höchsten GMLVQ-Score entsprachen den 20 AML-Patienten im Testsatz und wurden somit korrekt klassifiziert. Ko et al. entwickelten „supervised“ ML-Techniken zur objektiven Erkennung von minimaler Resterkrankung („minimal residual disease“, MRD) bei AML- und MDS-Patienten mit hoher Genauigkeit (>90%) innerhalb beider Kohorten [15]. Des Weiteren entwickelten Chulián et al. einen ML-basierten Algorithmus, um Unterschiede in der Expression von Markern zwischen rezidivierenden und nichtrezidivierenden Erkrankungen von Patienten mit akuter lymphatischer B-Zell-Leukämie (B-ALL) zu erkennen [16]. Die Korrelationsanalyse ergab einen Zusammenhang zwischen der

CD38-Expression und der Wahrscheinlichkeit eines Rückfalls der ALL.

## Zytogenetik

Die zytogenetische Untersuchung bei Patienten mit akuten Leukämien ist weiterhin der Goldstandard, nicht nur für die Patientenstratifikation und Prognosebeurteilung, sondern auch für die jeweilige Therapieentscheidung. Mithilfe der Chromosomenbandenanalyse (CBA) werden zytogenetische Anomalien identifiziert, indem die einzelnen Chromosomen auf Grundlage verschiedener phänotypischer Merkmale wie Größe und Bänderung manuell in einem komplexen, zeitlich sehr intensiven Prozess durch den Zytogenetiker beurteilt werden.

### » Im Karyogramm werden die spezifischen Bandenmuster eines jeden Chromosoms einzeln beurteilt

Im Karyogramm werden die spezifischen Bandenmuster eines jeden Chromosoms einzeln beurteilt, um zwischen normalen und aberranten Chromosomen zu unterscheiden. Die beiden wichtigsten Kategorien von Chromosomenaberrationen sind strukturelle Anomalien, die die Struktur der Chromosomen verändern (z. B. Translokationen, Inversionen, Deletionen, Duplikationen) sowie der Zugewinn oder Verlust ganzer Chromosomen, die allgemein als numerische Anomalien bezeichnet werden.

Der Prozess der Analyse des Karyotyps umfasst 2 Hauptkomponenten. Zunächst werden die Chromosomen aus den unter dem Mikroskop aufgenommenen digitalen Bildern der Metaphasechromosomen segmentiert. Anschließend werden die Chromosomen ihrer jeweiligen Chromosomenklasse (1–22, X bzw. Y) zugeordnet und analysiert, ob eine Abweichung in der Anzahl oder Struktur der Chromosomen von einem normalen Chromosomensatz vorliegt. Bei diesem Verfahren sind die Segmentierung und Klassifizierung sehr zeitaufwendig, und herkömmliche geometrische oder statistische Methoden haben aufgrund der großen Heterogenität der Chromosomen bisher nur eine begrenzte Unterstützung und damit Erleichterung des Arbeitsaufwands erzielen können. Daher ist weiterhin speziell

bei der Chromosomenanalyse akuter Leukämien noch ein erheblicher menschlicher Aufwand durch den Zytogenetiker erforderlich, um die Segmentierung und Klassifikation der Chromosomen zu überprüfen und die ggf. entstehenden Fehler zu korrigieren. Um diesen sehr zeitaufwendigen Prozess der manuellen Karyotypisierung zu beschleunigen, wurden innerhalb der letzten Jahre zahlreiche automatisierte Karyotypisierungssysteme entwickelt. Diese liefern zwar innerhalb der Chromosomenklassifizierung bereits eine wertvolle Unterstützung, sind jedoch bisher nur zu einem geringen Anteil in der Lage, chromosomale Aberrationen selbstständig zu detektieren. Durch den Einsatz von DL-Methoden, insbesondere durch CNN, konnte man der automatisierten Karyotypisierung bei einer ausreichenden Größe des verfügbaren Trainingsdatensatzes bereits einen deutlichen Schritt näherkommen [17].

Auf dem Weg zur automatisierten Detektion von Chromosomenaberrationen konnten erste ML-basierte Fortschritte erzielt werden. Al-Khatib et al. entwickelte einen DL-basierten Algorithmus, der nicht nur eine automatische Segmentierung und Klassifikation der Chromosomen vornimmt, sondern auch 4 häufige Trisomien automatisch erkennt [18]. Diese vielversprechende neu entwickelte DL-basierte Methode könnte künftig auch die Detektion von anderen numerischen Aberrationen zum Einsatz kommen. Außerdem haben kürzlich Cox et al. ein System vorgestellt, welches durch den Einsatz von CNN zur genauen Klassifikation von zytogenetischen Anomalien eine prädiktive Genauigkeit von 96,86% in der Validierungsgruppe und 94,03% in der Testgruppe erzielte [19]. Diese Ergebnisse unterstreichen die Anwendbarkeit dieses ML-basierten Ansatzes, um künftig automatisch numerisch abnorme Chromosomen zu klassifizieren. Während die ML-basierte Detektion von numerischen Aberrationen somit entscheidende Fortschritte innerhalb der letzten Jahre aufwies, bestehen auf dem Weg zur ML-basierten Detektion struktureller Chromosomenaberrationen derzeit noch einige Hürden. Ein Grund hierfür ist insbesondere die sehr geringe Trainingsdatenmengen aufgrund einer großen Vielfalt und Heterogenität

der strukturellen Chromosomenveränderungen.

Nichtsdestotrotz werden DL-basierte Methoden zur Karyotypanalyse künftig mit hoher Wahrscheinlichkeit zum neuen Standard in der Zytogenetik werden und somit die tägliche Arbeit der Zytogenetiker unterstützen und gg. pass. gezielte Entscheidungsprozesse beschleunigen (▣ Abb. 2).

## Molekulargenetik

In den letzten Jahren wurde die molekulare Sequenzierung bei Patienten mit akuten Leukämien nicht nur in großem Umfang innerhalb der klinischen Forschung eingesetzt, sondern wurde auch im Bereich der klinischen Diagnostik zum neuen Standard. Mit der Identifikation molekularer Zielstrukturen konnten neue zielgerichtete Substanzen wie z. B. *IDH2*-Inhibitoren (Enasidenib) entwickelt werden, die nun bei Patienten mit einer AML und *IDH2*-Mutation zu vielversprechenden klinischen Ergebnissen führen [20]. Inzwischen wird neben der gezielten Sequenzierung von spezifischen Genregionen, die mit dem Auftreten einer akuten myeloischen oder lymphatischen Leukämie (AML/ALL) in Verbindung stehen, zunehmend auch eine Ganz-Exom-Sequenzierung („whole exome sequencing“, WES) in der hämatologischen Routinediagnostik durchgeführt. Die vollständige Transkriptomsequenzierung („whole transcriptome sequencing“, WTS) und die vollständige Genomsequenzierung („whole genome sequencing“, WGS) werden bisher vorwiegend in der translationalen klinischen Forschung eingesetzt, sind jedoch ebenfalls auf dem Weg, sich zu einem wertvollen diagnostischen Werkzeug zu entwickeln. Durch den etablierten Einsatz dieser Hochdurchsatz-Assays und die damit assoziierte rasante Erzeugung von großen Datenmengen sind die molekulargenetischen Analyseergebnisse im Bereich von „big data“ angekommen. Zur umfassenden Analyse dieser massiven Datenmengen, dem damit assoziierten klinischen Erkenntnisgewinn sowie zur Detektion von neuen molekularen Biomarkern werden zunehmend elaborierte ML- und DL-basierte Methoden benötigt.

Mit den enormen Fortschritten beim „next-generation sequencing“ (NGS) und

der weiter zunehmenden Detektion von assoziierten Genomregionen bei Patienten mit akuten Leukämien nimmt nicht nur die Menge, sondern auch die Vielschichtigkeit der verfügbaren molekular-genetischen Daten derzeit rasant zu. Aufgrund der hohen Komplexität der nachfolgenden Klassifizierung, Annotation und Validierung der erhaltenen Ergebnisse ist der Bereich der Molekulargenetik ebenfalls prädestiniert für die Anwendung von neuen ML-Methoden.

Eines der leistungsfähigsten DL-basierten Tools für die Interpretation von Varianten und die Beurteilung der Frage, welche Mutationen die Tumorentstehung vorantreiben können, ist der BoostDM-Algorithmus [21]. Muñios et al. entwickelten den Algorithmus für die In-silico-Sättigungsmutagenese von Krebsgenen zur spezifischen Bewertung des onkogenen Potenzials von Mutationen in menschlichen Geweben. Die Analyse umfasste 66 Krebsarten aus 221 Kohorten und 28.076 Tumoren, darunter auch zahlreiche Kohorten von hämatologischen Erkrankungen. Durch den neuen Ansatz könnte künftig die Interpretation von Varianten im klinischen Umfeld unterstützt werden und damit den Weg für die Erstellung patientenspezifischer Krebsgenomprofile ebnet.

### » Präzisionsmedizin im Bereich Hämatologie hat individualisierte Behandlungskonzepte für Patienten zum Ziel

Die Präzisionsmedizin im Bereich der Hämatologie zielt darauf ab, den Patienten maßgeschneiderte, individualisierte Behandlungskonzepte anzubieten, die spezifisch auf die jeweiligen molekularen Veränderungen der Erkrankung zugeschnitten sind [2]. Petak et al. entwickelten ein System für das „digital drug assignment“ (DDA), eine KI-basierte Methode um für jeden Krebspatienten auf der Grundlage seiner individuellen genetischen Veränderungen ein priorisierendes Scoringssystem für infrage kommende molekular zielgerichtete Wirkstoffe („molecular targeted agents“, MTA) anzubieten ([22]; **Abb. 2**). Erste Studien, bei denen das DDA-System vor der Therapieentscheidung zum Einsatz kam, konnten bereits zeigen, dass das mediane pro-

gressionsfreie Überleben bei Patienten, die MTA mit hohen DDA-Scores erhielten, deutlich länger war als bei Patienten, die MTA mit niedrigen DDA-Scores erhielten. Der künftige Einsatz solcher neuer KI-basierten Stratifikationsysteme kann den Weg zum Einsatz von Präzisionsmedizin in der klinischen Routine weiter ebnet.

### Prognoseeinschätzung und Therapieempfehlung

Die Entwicklung und Implementierung von ML-basierten Methoden für die Analyse von individuellen molekularen Patientenprofilen ist nicht nur für die klinische Diagnose relevant, sondern auch für die nachfolgende Patientenstratifikation, Prognosebeurteilung sowie Therapieempfehlung. Die Diversität der verschiedenen Krankheitsbilder, insbesondere im Bereich der akuten Leukämien, muss hierbei, doch durch die Wahl signifikanter und expressiver Endpunkte, gekennzeichnet sein, um den Therapieerfolg gegenüber einem ML-Verfahren auf Datenebene eindeutig zu spezifizieren. Neben eindeutigen klinischen Faktoren wie Remission, kurz- und langfristiges Überleben sowie dem Auftreten von relevanten Nebenwirkungen sollte an dieser Stelle der zunehmende Fokus auf „patient-reported outcomes“ (PRO) erwähnt werden. Ein modellbasierte Therapieempfehlung sollte in Zukunft neben patientenindividuellen sowie krankheitsspezifischen Merkmalen auch den jeweiligen Wunsch des Patienten („shared decision-making“) berücksichtigen (**Abb. 2**). Je vielseitiger und personalisierter die Therapiestrategien und die verfügbare Datenlage, desto schwieriger wird künftig auch die Suche nach einer optimalen individuellen Behandlungsoption. Verfahren, die in naher Zukunft in allen hämatologischen Disziplinen an Relevanz gewinnen werden, sind deshalb In-silico-Ansätze wie der „digitale Zwilling“ und die daraus abgeleitete Möglichkeit zur Simulation verschiedener therapeutischer Szenarien am virtuellen Patienten [23].

Auch im Bereich der individualisierten Prognose sowie der Risikostratifikation haben sich durch den Einsatz von datenbasierten Methoden in den letzten Jahren grundlegende Aspekte geändert. Wag-

ner et al. entwickelten so etwa ein KNN zur Kombination verfügbarer molekularer Daten aus verschiedensten Datenbanken und identifizierten damit prognostisch relevante 3-Gen-Signaturen [24]. Diese teilten Patienten mit einer AML erfolgreich in Kohorten mit unterschiedlicher Überlebenswahrscheinlichkeit auf. Ijaz et al. entwickelten ein personalisiertes Vorhersagemodell für das individuelle Gesamtüberleben sowie die Wahrscheinlichkeit des Übergangs in eine sekundäre AML anhand einer Analyse von 1471 Daten von MDS-Patienten [25]. Die Analyse basierte auf dem verfügbaren Mutationsstatus von 20 verschiedenen Genen mit nachgewiesener klinischer Bedeutung beim MDS, zytogenetischen Veränderungen sowie verschiedenen klinischen Variablen und Laborparametern (z.B. Blastenzahl im Knochenmark, Hämoglobin, Thrombozyten). Die Anzahl der Mutationen pro Patienten war ein unabhängiger negativer prognostischer Faktor für das Gesamtüberleben sowie für die Rate an Transformationen in eine AML. Das neu entwickelte ML-basierte Risikostratifikationsmodell übertraf dabei sogar etablierte MDS-Risikoscores wie IPSS (International Prognostic Scoring System) oder IPSS-R (Revised International Prognostic Scoring System) [25].

Mit der Zunahme von verfügbaren und gut annotierten molekularen Profilen großer Patientenkohorten kann sich auch die Generalisierbarkeit von ML-basierten Analysen stetig verbessern, um künftig KI-gestützte Systeme zur Unterstützung von Therapieentscheidungen und Prognosebeurteilung in der klinischen Versorgung einsetzen zu können. Hierbei müssen jedoch auch strenge ethische und regulatorische Anforderungen (z.B. die Zulassung als zertifiziertes Medizinprodukt) erfüllt werden. Zusätzlich ist es hinsichtlich der Akzeptanz solcher Lösungen von zentraler Bedeutung, dass die Ergebnisse für die behandelnden Ärzte lückenlos nachvollziehbar und intuitiv interpretierbar sind. Die individuellen entscheidungsrelevanten Faktoren sollten den betreuenden Ärzten dabei erklärbar visualisiert werden, um ein hohes Maß an Transparenz bei der Umsetzung der Diagnose- oder Therapieempfehlung zu gewährleisten.

## Ausblick

Die essenzielle Voraussetzung für die Anwendung von KI im Bereich der Hämatologie ist das Vorhandensein einer strukturierten Datenbasis. Um KI auch nachhaltig in den klinischen Alltag des Managements akuter Leukämien zu integrieren, müssten zudem die vorhandene Datengrundlagen und Prozesse in enger Abstimmung mit klinischen Experten formalisiert werden, um so aus der Translation von Forschungsergebnissen echten Mehrwert für Patienten zu generieren. Besonderen Fokus bei der Entwicklung KI-gestützter Methoden muss dabei auf die auch für den Kliniker vorhandene Erklärbarkeit und Interpretierbarkeit der Modellergebnisse gelegt werden. Somit können zum einen regulatorische Hürden während der Zulassung von Systemen bewältigt werden und zum anderen das Vertrauen der Anwender in innovative Unterstützungssysteme gewährleistet werden. In der Folge können KI-basierte Methoden künftig an verschiedensten Stellen des Patientenmanagements im Bereich der Hämatologie ansetzen, um Prozesse einfacher, schneller und sicherer zu gestalten und somit den klinischen Alltag zu erleichtern.

### Fazit für die Praxis

- Die wohl größte Herausforderung, um die künstliche Intelligenz (KI) in die tägliche hämatologische Praxis zu integrieren, ist die Schaffung einer formalisierten Datengrundlage.
- Die Entwicklung von KI-gestützten Methoden sollte in enger Kooperation mit medizinischen Experten sowie KI-Entwicklern erfolgen, um relevante klinische Fragestellungen im richtigen Kontext beantworten zu können.
- Nur wenn die aus den KI-Lösungen abgeleiteten klinischen Ergebnisse und Handlungsempfehlungen erklärbar und interpretierbar sind, hat die KI künftig das Potenzial, die klinischen Prozess in der Hämatologie zu transformieren und das Management von Patienten mit Krebserkrankungen grundlegend zu ändern.

## Artificial intelligence in the management of acute leukemia

**Background:** Artificial intelligence (AI)-based systems have the potential to revolutionize healthcare worldwide and are already increasing the accuracy and efficiency of diagnosis and treatment in various medical disciplines, including hematology. The systems are equipped to interpret large amounts of data to guide early diagnosis and prognosis assessment, as well as the treatment decision-making process for hematologic diseases. The recent success of AI-based systems has been driven by both the rapid performance improvement in computer technology and the establishment of new learning algorithms. Additionally in the medical field, the availability of large data sets is increasing due to the advancing digitalization and formalization of general clinical documentation, innovations in imaging techniques, and the increasing routine use of high-throughput sequencing tests. These enable the incorporation of molecular data into clinical decision making and consequently personalized interventions that overcome the “one size fits all” paradigm on treatment decisions and improve individualized treatment outcomes.

**Conclusions:** Potential applications of AI-based methods in the field of hematology are numerous: in addition to generating new evidence machine learning (ML) methods open promising opportunities to assist hematologists in time-consuming routine tasks, so that medical resources can be used for cognitively more challenging tasks, e.g. clarification of rare clinical constellations and communication with patients.

### Keywords

Artificial intelligence · Precision medicine · Deep learning · Machine learning · Hematologic diseases

### Korrespondenzadresse

#### Dr. med. c. Anne Sophie Kubasch

Klinik und Poliklinik für Hämatologie, Zelltherapie und Hämostaseologie, Arbeitsgruppe „Artificial Intelligence in Hematology“, Universitätsklinikum Leipzig Leipzig, Deutschland  
 anne.sophie.kubasch@medizin.uni-leipzig.de

### Einhaltung ethischer Richtlinien

**Interessenkonflikt.** A.S. Kubasch, N. Grieb, A. Oeser, C. Haferlach und U. Platzbecker geben an, dass kein Interessenkonflikt besteht.

Für diesen Beitrag wurden von den Autoren keine Studien an Menschen oder Tieren durchgeführt. Für die aufgeführten Studien gelten die jeweils dort angegebenen ethischen Richtlinien.

**Open Access.** Dieser Artikel wird unter der Creative Commons Namensnennung 4.0 International Lizenz veröffentlicht, welche die Nutzung, Vervielfältigung, Bearbeitung, Verbreitung und Wiedergabe in jeglichem Medium und Format erlaubt, sofern Sie den/die ursprünglichen Autor(en) und die Quelle ordnungsgemäß nennen, einen Link zur Creative Commons Lizenz beifügen und angeben, ob Änderungen vorgenommen wurden.

Die in diesem Artikel enthaltenen Bilder und sonstiges Drittmaterial unterliegen ebenfalls der genannten Creative Commons Lizenz, sofern sich aus der Abbildungslegende nichts anderes ergibt. Sofern das betreffende Material nicht unter der genannten Creative

Commons Lizenz steht und die betreffende Handlung nicht nach gesetzlichen Vorschriften erlaubt ist, ist für die oben aufgeführten Weiterverwendungen des Materials die Einwilligung des jeweiligen Rechteinhabers einzuholen.

Weitere Details zur Lizenz entnehmen Sie bitte der Lizenzinformation auf <http://creativecommons.org/licenses/by/4.0/deed.de>.

### Literatur

#### Verwendete Literatur

1. Topol EJ (2019) High-performance medicine: the convergence of human and artificial intelligence. *Nat Med* 25(1):44–56
2. MacEachern SJ, Forkert ND (2021) Machine learning for precision medicine. *Genome* 64(4):416–425
3. Shouval R, Fein JA, Savani B, Mohty M, Nagler A (2021) Machine learning and artificial intelligence in haematology. *Br J Haematol* 192(2):239–250
4. Nenoff K, Grieb N, Oeser A, Neumuth T, Platzbecker U, Kubasch AS (2021) Künstliche Intelligenz in der Hämatologie. *InFo Hämatol Onkol* 24(12):10–13
5. Rajkomar A, Dean J, Kohane I (2019) Machine learning in medicine. *N Engl J Med* 380(14):1347–1358
6. Meskó B, Görög M (2020) A short guide for medical professionals in the era of artificial intelligence. *NPJ Digit Med* 3(1):126
7. Sidey-Gibbons JAM, Sidey-Gibbons CJ (2019) Machine learning in medicine: a practical introduction. *BMC Med Res Methodol* 19(1):64
8. Liu Y, Jain A, Eng C, Way DH, Lee K, Bui P et al (2020) A deep learning system for differential diagnosis of skin diseases. *Nat Med* 26(6):900–908

9. Lotter W, Diab AR, Haslam B, Kim JG, Grisot G, Wu E et al (2021) Robust breast cancer detection in mammography and digital breast tomosynthesis using an annotation-efficient deep learning approach. *Nat Med* 27(2):244–249
10. Matek C, Krappe S, Münzenmayer C, Haferlach T, Marr C (2021) Highly accurate differentiation of bone marrow cell morphologies using deep neural networks on a large image data set. *Blood* 138(20):1917–1927
11. Kimura K, Tabe Y, Ai T, Takehara I, Fukuda H, Takahashi H et al (2019) A novel automated image analysis system using deep convolutional neural networks can assist to differentiate MDS and AA. *Sci Rep* 9(1):13385
12. Nagata Y, Zhao R, Awada H, Kerr CM, Mirzaev I, Kongkiatkamon S et al (2020) Machine learning demonstrates that somatic mutations imprint invariant morphologic features in myelodysplastic syndromes. *Blood* 136(20):2249–2262
13. Angeletti C (2018) A method for the interpretation of flow cytometry data using genetic algorithms. *J Pathol Inform* 9:16
14. Biehl M, Bunte K, Schneider P (2013) Analysis of flow cytometry data by matrix relevance learning vector quantization. *PLoS One* 8(3):e59401
15. Ko B-S, Wang Y-F, Li J-L, Li C-C, Weng P-F, Hsu S-C et al (2018) Clinically validated machine learning algorithm for detecting residual diseases with multicolor flow cytometry analysis in acute myeloid leukemia and myelodysplastic syndrome. *EBioMedicine* 37:91–100
16. Chulián S, Martínez-Rubio Á, Pérez-García VM, Rosa M, Blázquez Goñi C, Rodríguez Gutiérrez JF et al (2020) High-dimensional analysis of single-cell flow cytometry data predicts relapse in childhood acute lymphoblastic leukaemia. *Cancers* 13(1):17
17. Hu X, Yi W, Jiang L, Wu S, Zhang Y, Du J et al (2019) Classification of metaphase chromosomes using deep convolutional neural network. *J Comput Biol* 26(5):473–484
18. Al-Kharraz MS, Elrefaei LA, Fadel MA (2020) Automated system for chromosome karyotyping to recognize the most common numerical abnormalities using deep learning. *IEEE Access* 8:157727–157747
19. Cox A, Park C, Koduru P, Wilson K, Weinberg O, Chen W et al (2022) Automated classification of cytogenetic abnormalities in hematolymphoid neoplasms. *Bioinformatics* 38(11):3142–3146
20. DiNardo CD, Schuh AC, Stein E, Montesinos P, Wei AH, de Botton S et al (2021) Etoposin plus azacitidine versus azacitidine alone in patients with newly diagnosed, mutated-IDH2 acute myeloid leukaemia (AG221-AML-005): a single-arm, phase 1b and randomised, phase 2 trial. *Lancet Oncol* 22(11):1593–1608
21. Morales F, Martínez-Liménez F, Pich O, Gonzalez-Perez J, Lopez-Lagas N (2021) In silico saturation mutagenesis of cancer genes. *Nature* 591(7872):428–432
22. Petaliti, Kamal M, Dirner A, Bieche I, Doczi R, Mariani O et al (2021) A computational method for prioritizing targeted therapies in precision oncology: performance analysis in the SHIVA01 trial. *NPJ Precis Oncol* 5(1):59
23. Björnsson B, Borrebaeck C, Elander N, Gasslander T, Gawel DR, Gustafsson M et al (2019) Digital twins to personalize medicine. *Genome Med* 12(1):4
24. Wagner S, Vadakekolathu J, Tasian SK, Altmann H, Bornhäuser M, Pockley AG et al (2019) A parsimonious 3-gene signature predicts clinical outcomes in an acute myeloid leukemia multicohort study. *Blood Adv* 3(8):1330–1346
25. Nazha A, Komrokji R, Meggendorfer M, Jia X, Radakovich N, Shreve J et al (2021) Personalized prediction model to risk stratify patients with myelodysplastic syndromes. *J Clin Oncol* 39(33):3737–3746

### Weiterführende Literatur

26. Wu Y-Y, Huang T-C, Ye R-H, Fang W-H, Lai S-W, Chang P-Y et al (2020) A hematologist-level deep learning algorithm (BMSnet) for assessing the morphologies of single nuclear balls in bone marrow smears: algorithm development. *JMIR Med Inform* 8(4):e15963–8
27. Xie N, Li X, Li K, Yang Y, Shen HT (2019) Statistical karyotype analysis using CNN and geometric optimization. *IEEE Access* 7:179445–179453
